# Supplementary material for: A reporting and analysis framework for structured evaluation of COVID-19 clinical and imaging data
Source: Springer Nature journal article supplement (doi:10.1038/s41746-021-00439-y), 2021-04-12
Supplement: 41746_2021_439_MOESM2_ESM.pdf [file 41746_2021_439_MOESM2_ESM.pdf]

# COVID-19 Trial report - 03/13/2020

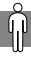

Covid-19, Nr1 (M)

03/25/1965

ID 978647854

COVID-19 Trial Case

## Overall assessment

### Diagnostics

**Pulmonary findings consistent with COVID infection:**  
Highly consistent

### Disease overview

The following diagram is an abstract representation of the disease. It does not depict real patient anatomy.

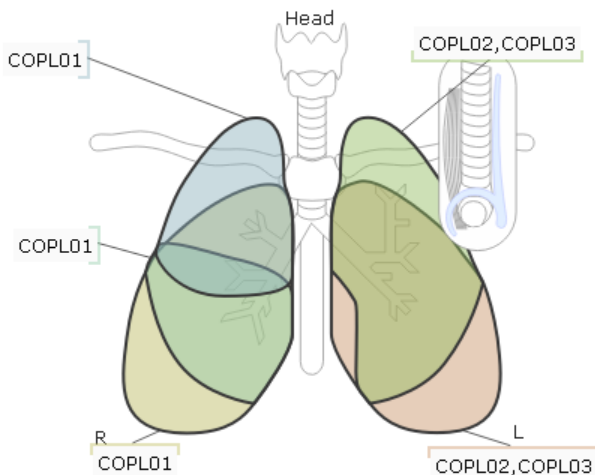

COPL04 Lung right is not visible in the graphical overview.

## General

### Demographic information

Age: 55 yrs

Gender: Male

### History of exposure to infection

Contact history: Present

Date of contact with infected person(s): 02/24/2020

Exposure to high-risk geographic area: Present

Geographic Area: Südtirol

### COVID-compatible radiological signs

Distribution pattern: Peripheral

**Laterality of lung lobe involvement:** Bilateral (Parenchymal abnormalities defined in both lungs)

**Lung lobes with Ground-glass opacities (GGO):** 5 (GGO present in: Lung middle lobe right, Lung lower lobe left, Lung upper lobe right, Lung lower lobe right, Lung upper lobe left)

**Lung lobes with GGO with consolidation:** 5 (GGO with consolidation present in: Lung middle lobe right, Lung lower lobe left, Lung upper lobe right, Lung lower lobe right, Lung upper lobe left)

**Lung lobes with GGO with interlobular septal thickening:** 5 (GGO with interlobular septal thickening present in: Lung middle lobe right, Lung lower lobe left, Lung upper lobe right, Lung lower lobe right, Lung upper lobe left)

**Lung lobes with GGO with intralobular septal thickening:** 5 (GGO with intralobular septal thickening present in: Lung middle lobe right, Lung lower lobe left, Lung upper lobe right, Lung lower lobe right, Lung upper lobe left)

## Clinical chemistry

White blood cell count: Increased

Lymphocyte count: Increased

Platelet count: Increased

C-Reactive Protein: Normal

## Clinical symptoms

Fever: Present

If fever present, please provide details: 39

Respiratory distress: Present

Headache: Present

Nausea: Not present

Diarrhea: Not present

## Comorbidities

Tobacco smoking: No history

Chronic obstructive pulmonary disease: No

Hypertension: No

Cardiac disease: No

Chronic liver disease: No

Diabetes: No

## Parenchymal abnormalities

### COPL01 Lung right

**Size:** 36.0 mm (LA) (-20.4% ΔB / -20.4% ΔN / -20.4% ΔP) / 21.3 mm (SA) (-34.3% ΔB / -34.3% ΔN / -34.3% ΔP)

State: Present

**Involved lung lobes:** Lung upper lobe right, Lung middle lobe right, Lung lower lobe right

Ground-glass opacity (GGO): Present

GGO: with consolidation: Present

GGO: with interlobular septal thickening: Present

GGO: with intralobular septal thickening: Present

Lesion radiographic assessment: Improvement

### COPL02 Lung left

**Size:** 18.1 mm (LA) (-45.5% ΔB / -45.5% ΔN / -45.5% ΔP) / 12.7 mm (SA) (-24.9% ΔB / -24.9% ΔN / -24.9% ΔP)

State: Present

**Involved lung lobes:** Lung upper lobe left, Lung lower lobe left

Ground-glass opacity (GGO): Present

GGO: with consolidation: Present

GGO: with interlobular septal thickening: Present

GGO: with intralobular septal thickening: Present

### COPL03 Lung left

**Size:** 20.9 mm (LA) (-8.7% ΔB / -8.7% ΔN / -8.7% ΔP) / 15.4 mm (SA) (-0.6% ΔB / -0.6% ΔN / -0.6% ΔP)

State: Present

**Involved lung lobes:** Lung upper lobe left, Lung lower lobe left

### COPL04 Lung right

**Size:** 31.4 mm (LA) (-14.0% ΔB / -14.0% ΔN / -14.0% ΔP) / 15.1 mm (SA) (-36.8% ΔB / -36.8% ΔN / -36.8% ΔP)

State: Present

# COVID-19 Trial report - 03/13/2020

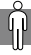

Covid-19, Nr1 (M)

03/25/1965

ID 978647854

COVID-19 Trial Case

## Parenchymal abnormalities

| COPL01 Lung right<br>Size                                                        | COPL02 Lung left<br>Size                                                          | COPL03 Lung left<br>Size                                                           | COPL04 Lung right<br>Size                                                           |
|----------------------------------------------------------------------------------|-----------------------------------------------------------------------------------|------------------------------------------------------------------------------------|-------------------------------------------------------------------------------------|
| 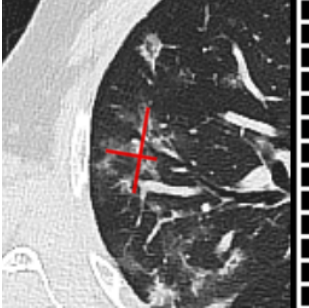 |  |  |  |
| 36.0 mm (LA) (-20.4% ΔP)<br>21.3 mm (SA) (-34.3% ΔP)                             | 18.1 mm (LA) (-45.5% ΔP)<br>12.7 mm (SA) (-24.9% ΔP)                              | 20.9 mm (LA) (-8.7% ΔP)<br>15.4 mm (SA) (-0.6% ΔP)                                 | 31.4 mm (LA) (-14.0% ΔP)<br>15.1 mm (SA) (-36.8% ΔP)                                |

## Conformity check

### General

- Lung lobe not chosen for COPL04. Precise location influences count of lung lobes with COVID-compatible radiological signs.
